# Supplementary material for: Characteristics of Radon and Thoron Indoor and in Soil Gas and Sources of High Radon Potential in Urumqi, Xinjiang, Northwest China
Source: Preprints.org preprint supplement (doi:10.20944/preprints202307.1754.v1), 2023-07-26
Supplement: Supplementary file 1 [file Rn-RAD7(151).xlsx]

## Sheet: Sheet1
Number	Rn-RAD7 （Bq/m3）
1	117.05
2	105.186
3	121.531
4	86.4847
5	88.3204
6	89.7984
7	84.9583
8	94.5726
9	87.9476
10	106.174
11	56.9357
12	1885.13
13	73.2009
14	23.6822
15	36.0129
16	91.5677
17	101.487
18	97.7949
19	46.5701
20	49.8964
21	46.5849
22	37.1815
23	39.7776
24	52.8586
25	345.829
26	1140.9
27	48.7091
28	93.9116
29	40.0807
32	587.974
30	25.8047
31	30.5363
33	145.708
34	184.707
35	124.142
36	52.5324
37	34.9679
38	148.8
39	11.725
40	28.85
41	90.6833
42	130.333
43	207.399
44	346.606
45	278.281
46	168.053
47	272.442
48	226.596
49	125.705
52	39.679
50	595.277
53	65.6655
54	120.184
55	69.5377
51	27.0086
56	84.4071
57	363.911
58	71.5962
59	88.8821
60	45.6057
61	161.559
62	145.452
63	24.9324
64	109.038
65	85.9142
66	82.6176
67	109.008
68	85.9142
69	82.6176
70	249.008
71	31.4456
72	24.4942
73	18.4202
74	117.69
75	130.133
76	120.473
77	114.499
78	104.746
79	19.9962
80	227.193
81	59.4682
82	229.402
83	53.9288
84	68.9443
85	265.287
86	52.4244
87	73.6853
88	53.6631
89	51.7836
90	9.17708
91	110.424
92	32.9759
93	25.0225
94	164.006
95	28.3281
96	28.6912
97	249.915
98	239.113
99	67.4231
100	21.0301
101	35.8161
103	30.7612
107	17.9019
108	20.533
109	21.3387
110	22.4263
102	2086.14
104	1670.86
105	2138.48
106	2021.57
112	29.1948
113	40.3936
111	105.453
114	164.585
115	43.8618
116	17.9171
117	48.788
118	57.3091
119	53.6765
120	213.559
121	25.5695
122	487.809
123	109.915
124	32.3252
125	33.7968
126	385.161
127	485.584
128	402.5
129	150.644
130	222.091
131	130.47
132	27.5511
133	99.5778
134	2475.33
135	37.4712
136	59.2798
137	3409.83
138	3592.22
139	35.1155
140	37.309
141	40.6715
142	50.8632
143	25.4252
144	221.484
145	86.8613
146	228.908
147	632.598
148	4147.89
149	18.6739
150	20.4966
151	18.711
