# Supplementary material for: Characteristics of Radon and Thoron Indoor and in Soil Gas and Sources of High Radon Potential in Urumqi, Xinjiang, Northwest China
Source: Preprints.org preprint supplement (doi:10.20944/preprints202307.1754.v1), 2023-07-26
Supplement: Supplementary file 2 [file SSNTD and RAD7(16).xlsx]

## Sheet: Sheet1
code of SSNTD	Rn-222-SSNTD	Rn-220-SSNTD	Rn-RAD7
W311(w312)	70		114.6
W381(W382)	577	142	485.58
W323(W324)	122		27.55
W337(W338)	1353	121	99.58
W317(W318)	76	70	164.59
W313(W314)	78	82	125.71
W369(W370)	66	136	207.4
W321(W322)	61	165	35.82
W339(W340)	68		148.8
W391(W392)	67	10	104.75
W315(W316)	453	206	595.28
W303(W304)	91	126	120.18
W327(W328)	65		25.57
W305(W306)	473	13	487.81
W379(W380)	79	61	114.5
W301(W302)	3677		3592
