# Supplementary material for: Characteristics of Radon and Thoron Indoor and in Soil Gas and Sources of High Radon Potential in Urumqi, Xinjiang, Northwest China
Source: Preprints.org preprint supplement (doi:10.20944/preprints202307.1754.v1), 2023-07-26
Supplement: Supplementary file 3 [file U、Ra、Cs、Rn、Tn(45).xlsx]

## Sheet: Sheet1
code	Cs	Cs-SD	U-238（Bq/kg)	U-SD	Ra-226 (Bq/kg)	Ra-SD	Th-232 Bq/kg	Th-SD	K-40 Bq/kg	K-SD	Rn-Bq/m3	Tn-Bq/m3	kBq=Rn	kBq=Tn
13-1	0	0.0509902	38.2816	6.30726	36.6577	2.15774	42.6372	2.83443	865.872	44.4239	52483.3	6575	52.4833	6.575
13-2	0	0.0509902	52.8735	7.95818	53.5438	3.07198	38.8411	2.85836	773.792	40.1776	59416.7	6608.33	59.4167	6.60833
13-9	2.80747	0.112606	36.1979	6.9072	41.6916	2.55502	45.396	3.32698	840.515	43.6877	73750	19000	73.75	19
13-10	1.38185	0.143467	36.2442	7.09346	43.6926	2.60497	46.959	3.28626	868.038	44.9335	137000	24500	137	24.5
13-11	1.61544	0.138433	45.5225	7.22268	41.3232	2.50593	46.5563	3.27329	904.715	46.7626	63240	27840	63.24	27.84
13-12	0.137012	1.05733	39.1063	7.16727	42.3792	2.61508	45.7744	3.2941	893.842	46.411	126833	27133.3	126.833	27.1333
14-1	5.26559	0.0937747	42.2277	7.59007	43.5598	2.75999	40.3251	3.31197	858.206	45.08	25771.4	5088.57	25.7714	5.08857
14-2	2.1035	0.13927	39.8168	5.98547	53.4248	3.08565	27.1536	2.48429	840.525	43.5532	10929	7651	10.929	7.651
14-3	1.62162	0.173368	48.3277	7.03179	52.4475	2.96816	40.8103	2.86066	838.898	43.1755	26522.2	8604.44	26.5222	8.60444
14-4	1.23556	0.232754	53.1755	8.91748	70.5287	4.09126	41.1705	3.40196	884.764	46.3944	20800	5414	20.8	5.414
14-5	3.39565	0.121244	48.0801	7.72241	53.1063	3.1788	38.1786	3.01784	858.756	44.8038	28000	6076.67	28	6.07667
14-6	3.10237	0.103006	37.7395	6.48024	43.1466	2.57663	40.5588	2.94907	797.823	41.3405	51540	24700	51.54	24.7
14-7	0	0.0509902	54.688	8.41557	61.6673	3.68295	40.0939	3.41267	854.642	44.9987	21933.3	8230	21.9333	8.23
14-8	0	0.0509902	71.9323	10.4014	104.26	5.74843	40.8683	3.43107	834.268	43.8482	19220	12840	19.22	12.84
15-1	0	0.0509902	35.7684	6.66325	39.1524	2.64031	41.4405	3.52608	917.848	48.3267	6326	17300	6.326	17.3
15-2	0.311385	0.693178	30.6779	6.4148	32.1547	2.20569	43.6807	3.38707	874.287	45.8714	10250	12575	10.25	12.575
15-3	0	0.0509902	34.4199	5.74168	30.2676	1.88433	32.4544	2.48159	814.731	42.0502	11078	8294	11.078	8.294
15-4	0	0.0509902	34.3878	6.52989	30.0035	2.09993	32.2804	2.8807	847.686	44.5274	11300	11673.3	11.3	11.6733
16-1	7.27127	0.0787401	42.9072	8.08845	53.3238	3.19666	42.4563	3.32029	797.728	41.8546	19633.3	17616.7	19.6333	17.6167
16-2	3.38488	0.0943629	46.064	6.75636	55.8332	3.09883	41.7111	2.84789	4105.16	210.803	12400	16085	12.4	16.085
16-3	0	0.0509902	40.727	6.61874	38.6436	2.41364	41.1081	3.12731	881.079	45.7246	2980	18800	2.98	18.8
16-4	0	0.0509902	36.2946	6.06273	30.6413	1.88154	41.2062	2.79543	824.336	42.3302	15540	18640	15.54	18.64
16-5	0	0.0509902	39.8624	6.1189	36.6013	2.20362	38.0756	2.72623	798.254	41.2197	17175	19725	17.175	19.725
16-6	0	0.0509902	48.8963	6.94862	64.4537	3.50244	42.746	2.82497	1832.39	93.6179	75028.6	14742.9	75.0286	14.7429
16-7	2.29065	0.125889	38.1582	6.27644	37.5415	2.24894	38.5884	2.72667	2442.58	125.888	18688.9	22177.8	18.6889	22.1778
16-8	0.769352	0.252972	22.0338	5.27787	35.2354	2.12981	25.6422	2.10222	3512.75	180.79	9588.89	14301.1	9.58889	14.3011
16-9	2.19891	0.147025	51.2966	7.43774	61.3103	3.43786	35.5747	2.65386	5501.62	283.151	18985.7	16900	18.9857	16.9
17-1	2.10302	0.170217	40.5008	7.29808	45.9603	2.77992	43.7033	3.29298	935.611	48.4802	12880	17832	12.88	17.832
17-2	3.41081	0.111449	37.425	7.15048	42.6593	2.66113	44.249	3.3479	938.841	48.85	5775.56	16546.7	5.77556	16.5467
17-3	0	0.0509902	67.3573	8.40043	72.8502	3.83124	36.666	2.33643	5296.73	269.774
17-4	4.63292	0.106412	34.161	7.55065	33.5594	2.41058	37.0424	3.40157	6116.08	326.922	3745	19525	3.745	19.525
17-5	6.2269	0.0683392	31.109	5.27529	27.1692	1.67913	33.8729	2.39394	7090.48	363.465	1196.67	15633.3	1.19667	15.6333
17-6	1.82065	0.161747	41.0743	6.81444	47.2026	2.69421	46.4046	3.07331	9668.38	494.773	24380	16670	24.38	16.67
18-1	0	0.0509902	32.2139	6.47914	40.007	2.70933	47.3319	3.80929	913.279	48.2903	9004	13274	9.004	13.274
18-2	0	0.0509902	38.905	6.59853	38.4572	2.31212	42.3965	2.94529	9873.64	508.165	8573.33	16100	8.57333	16.1
18-3	26.7393	0.0552602	34.7474	6.58165	40.3767	2.45748	44.1721	3.15562	878.858	45.4039	7408.33	19700	7.40833	19.7
18-4	18.6231	0.0609007	38.4927	8.00094	38.6623	2.54198	45.9587	3.60306	890.104	46.6744	4372	16782	4.372	16.782
18-5	1.62493	0.192959	40.1549	6.98366	40.0179	2.43057	46.031	3.2536	867.868	44.858	7152	16860	7.152	16.86
18-6	7.75127	0.0825349	46.3138	8.22117	42.3687	2.85299	47.8349	4.00822	886.408	47.0451	5026.25	20700	5.02625	20.7
19-1	3.14283	0.117266	34.9759	7.34384	39.1416	2.51165	43.948	3.3661	845.965	44.2591	6753.33	17733.3	6.75333	17.7333
19-2	14.3749	0.0589088	40.3939	6.84097	38.8248	2.33849	46.8976	3.22222	860.483	44.3903	4706	17600	4.706	17.6
19-3	0	0.0509902	33.1173	6.5124	33.033	2.22241	41.0326	3.26781	847.196	44.3485	26900	11300	26.9	11.3
19-4	0.645976	0.309332	43.3493	7.10469	39.0698	2.387	45.2643	3.12903	838.194	43.367	2691.67	17933.3	2.69167	17.9333
19-5	1.69909	0.191127	38.8965	6.43107	40.9138	2.59424	42.4228	3.36379	808.564	42.3987	5052.86	21448.6	5.05286	21.4486
19-6	0.848167	0.254559	44.3283	7.85857	41.6423	2.75142	41.8655	3.49659	793.603	42.1196	3803.33	12166.7	3.80333	12.1667
